# Supplementary material for: Polyhedral structures with an odd number of vertices: nine-atom clusters and supramolecular architectures
Source: Royal Society of Chemistry journal article supplement (doi:10.1039/b718821h), 2008-01-01
Supplement: b718821h.pdf [file b718821h.pdf]

## **Polyhedral Structures with an Odd Number of Vertices: Nine- Atom Clusters and Supramolecular Architectures.**

Antonio Ruiz-Martínez, David Casanova, Santiago Alvarez

### **Electronic Supplementary Information**

#### **Contents**

|          |                                                                                                                                |
|----------|--------------------------------------------------------------------------------------------------------------------------------|
| Table S1 | Atomic Coordinates for Ideal 9-vertex Polyhedra                                                                                |
| Table S2 | Shape Measure of Some Transition Metal Clusters Relative to their Closest Ideal Shape (supplements the information of Table 2) |
| Table S3 | Shape Measures for Clusters of Group 13 and 14 Elements (data corresponding to Figure 4).                                      |
| Table S4 | Shape measures of Supramolecular Assemblies with nine transition metal atoms relative to their closest ideal shape.            |
| Table S5 | Shape Measures and Path Deviation Functions for Supramolecular Assemblies forming 3x3 Grids (Figure 7).                        |

**Table S1.** Atomic Coordinates for Ideal 9-vertex Polyhedra

**SG-9** (square grid)

|     |      |      |     |
|-----|------|------|-----|
| Tr1 | -1.0 | 1.0  | 0.0 |
| Tr2 | 0.0  | 1.0  | 0.0 |
| Tr3 | 1.0  | 1.0  | 0.0 |
| Tr4 | -1.0 | 0.0  | 0.0 |
| Tr5 | 0.0  | 0.0  | 0.0 |
| Tr6 | 1.0  | 0.0  | 0.0 |
| Tr7 | -1.0 | -1.0 | 0.0 |
| Tr8 | -1.0 | -1.0 | 0.0 |
| Tr9 | 1.0  | -1.0 | 0.0 |

**L-9** (linear chain)

|     |      |     |     |
|-----|------|-----|-----|
| Tr1 | -4.0 | 0.0 | 0.0 |
| Tr2 | -3.0 | 0.0 | 0.0 |
| Tr3 | -2.0 | 0.0 | 0.0 |
| Tr4 | -1.0 | 0.0 | 0.0 |
| Tr5 | 0.0  | 0.0 | 0.0 |
| Tr6 | 1.0  | 0.0 | 0.0 |
| Tr7 | 2.0  | 0.0 | 0.0 |
| Tr8 | 3.0  | 0.0 | 0.0 |
| Tr9 | 4.0  | 0.0 | 0.0 |

**HG-9** (hexagonal grid)

|     |        |      |     |
|-----|--------|------|-----|
| Tr1 | 0.0    | 1.0  | 0.0 |
| Tr2 | -0.866 | 0.5  | 0.0 |
| Tr3 | 0.866  | 0.5  | 0.0 |
| Tr4 | -1.732 | 0.0  | 0.0 |
| Tr5 | 0.0    | 0.0  | 0.0 |
| Tr6 | 1.732  | 0.0  | 0.0 |
| Tr7 | -0.866 | -0.5 | 0.0 |
| Tr8 | 0.866  | -0.5 | 0.0 |
| Tr9 | 0.0    | -1.0 | 0.0 |

**Table S2.** Shape Measure of Some Transition Metal Clusters Relative to their Closest Ideal Shape (supplements the information of Table 2).

| Refcode  | M <sub>9</sub>                  | Shape  | S(shape) |
|----------|---------------------------------|--------|----------|
| JUTFIN   | Ni <sub>9</sub>                 | 4:5    | 2.63     |
| JUTDUX   | Ni <sub>9</sub>                 | 4:5    | 2.65     |
| DOMMAT   | Ni <sub>9</sub>                 | 4:5    | 2.88     |
| JUTFAF   | Ni <sub>9</sub>                 | 4:5    | 2.90     |
| KAQTUR   | Co <sub>9</sub>                 | cCU-8  | 0.00     |
| VEDZOT   | Pd <sub>9</sub>                 | cCU-8  | 0.00     |
| SIWJUD   | Pd <sub>9</sub>                 | cCU-8  | 0.00     |
| LETWEM   | Co <sub>9</sub>                 | cCU-8  | 0.07     |
| LETWEM01 | Co <sub>9</sub>                 | cCU-8  | 0.07     |
| SAKTUT   | Ag <sub>9</sub>                 | cCU-8  | 1.81     |
| SIWJOX   | Pd <sub>9</sub>                 | cCU-8  | 4.33     |
| AGEVIR   | Ni <sub>9</sub>                 | CP-9   | 0.21     |
| GUNTUE   | Ni <sub>6</sub> Rh <sub>3</sub> | CP-9   | 0.25     |
| CESSIM   | Ag <sub>6</sub> Fe <sub>3</sub> | CP-9   | 0.79     |
| CAVKIT   | Os <sub>9</sub>                 | CP-9   | 3.67     |
| CAVKEP   | Os <sub>9</sub>                 | CP-9   | 3.77     |
| JAPWOM   | Au <sub>8</sub> Rh              | cvIC-8 | 0.38     |
| JAPWOM10 | Au <sub>8</sub> Rh              | cvIC-8 | 0.38     |
| SIYWIG   | Au <sub>8</sub> Pd              | cvIC-8 | 0.48     |
| ROQTOG   | Au <sub>8</sub> Pt              | cvIC-8 | 0.50     |
| JABMUU   | Au <sub>9</sub> Pt              | cvIC-8 | 0.95     |
| JOVGOQ   | Re <sub>9</sub>                 | fOC-9  | 0.02     |
| CAQPUF   | Rh <sub>9</sub>                 | fOC-9  | 0.03     |
| DOXKAC   | Rh <sub>8</sub> Pt              | fOC-9  | 0.03     |
| CEDSIO   | Rh <sub>8</sub> Ni              | fOC-9  | 0.06     |
| WETVUM   | Ir <sub>9</sub>                 | fOC-9  | 0.07     |
| VIPJIN   | Ir <sub>9</sub>                 | fOC-9  | 0.08     |
| FANBAX   | Co <sub>9</sub>                 | fOC-9  | 0.13     |
| PONGOO   | Ru <sub>6</sub> Pt              | fOC-9  | 0.20     |
| NAMDIO   | Ru <sub>6</sub> Pt <sub>3</sub> | fOC-9  | 0.23     |
| PONGUU   | Ru <sub>6</sub> Pt <sub>3</sub> | fOC-9  | 0.23     |
| NAMGUD   | Ru <sub>6</sub> Pt <sub>3</sub> | fOC-9  | 0.29     |
| JUTBEF   | Ru <sub>6</sub> Pt <sub>3</sub> | fOC-9  | 0.30     |
| JUTBEF10 | Ru <sub>6</sub> Pt <sub>3</sub> | fOC-9  | 0.30     |
| JUTBIJ10 | Ru <sub>6</sub> Pt <sub>3</sub> | fOC-9  | 0.32     |
| JUTBIJ   | Ru <sub>6</sub> Pt <sub>3</sub> | fOC-9  | 0.32     |

|          |                                 |          |      |
|----------|---------------------------------|----------|------|
| SSEPNI   | Ni <sub>9</sub>                 | fOC-9    | 0.35 |
| SSEPNI10 | Ni <sub>9</sub>                 | fOC-9    | 0.36 |
| POCLEY   | Ru <sub>6</sub> Pt <sub>3</sub> | fOC-9    | 0.36 |
| HABKUQ   | Ru <sub>6</sub> Pt <sub>3</sub> | fOC-9    | 0.36 |
| GISZOX   | Co <sub>9</sub>                 | fOC-9    | 1.54 |
| FALGUU   | Ni <sub>9</sub>                 | fOC-9    | 4.29 |
| DILRUL   | Cu <sub>5</sub> Fe <sub>4</sub> | HG-9     | 0.13 |
| YEMXAP   | Ag <sub>5</sub> Fe <sub>4</sub> | HG-9     | 0.22 |
| HENSOI   | Ru <sub>9</sub>                 | JCCU-9   | 3.64 |
| CURPAG   | Ni <sub>9</sub>                 | JGSP-9   | 0.08 |
| BEAMRH   | Rh <sub>9</sub>                 | JGSP-9   | 0.09 |
| XALNED   | Ni <sub>9</sub>                 | L-9      | 0.01 |
| XALNED   | Ni <sub>9</sub>                 | L-9      | 0.01 |
| CONTII   | Co <sub>9</sub>                 | rCSAPR-9 | 0.33 |
| JUXLUJ   | Ru <sub>5</sub> Co <sub>4</sub> | rTCTPR-9 | 4.41 |
| BETROH   | Au <sub>9</sub>                 | c-SAPR-8 | 0.74 |
| CEGVIT   | Au <sub>9</sub>                 | c-SAPR-8 | 0.75 |
| VAPYIU   | Au <sub>8</sub> Pd              | c-SAPR-8 | 1.26 |
| PHTPTC   | Pt <sub>9</sub>                 | TCL-9    | 1.59 |
| VAZWUO   | Au <sub>7</sub> Co <sub>2</sub> | vTRPY-9  | 0.21 |
| RAXPUC   | Au <sub>7</sub> Re <sub>2</sub> | vTRPY-9  | 0.95 |

---

**Table S3.** Shape Measures for Clusters of Group 13 and 14 Elements (data corresponding to Figure 4).

| Refcode                        | M <sub>9</sub>                | S(CSAPR) | S(TCTPR) | Dev.* |
|--------------------------------|-------------------------------|----------|----------|-------|
| <b>18 framework electrons:</b> |                               |          |          |       |
| B <sub>9</sub> Cl <sub>9</sub> | B <sub>9</sub>                | 1.54     | 1.04     | 0.54  |
| OHILUM                         | Ga <sub>9</sub>               | 1.58     | 0.42     | 0.30  |
| 84956                          | B <sub>9</sub>                | 1.48     | 0.81     | 0.44  |
| 410698                         | B <sub>9</sub>                | 1.49     | 0.74     | 0.42  |
| <b>19 framework electrons:</b> |                               |          |          |       |
| GOXWUL                         | B <sub>9</sub>                | 1.67     | 0.53     | 0.38  |
| <b>20 framework electrons:</b> |                               |          |          |       |
| BIFWOC                         | TlSn <sub>8</sub>             |          |          |       |
| MDCCNB                         | B <sub>7</sub> C <sub>2</sub> | 2.44     | 1.30     | 0.84  |
| MDCCNB                         | B <sub>7</sub> C <sub>2</sub> | 2.39     | 1.27     | 0.82  |
| GOXXAS                         | B <sub>9</sub>                | 2.27     | 0.89     | 0.67  |
| <b>21 framework electrons:</b> |                               |          |          |       |
| BEHMOR                         | Ge <sub>9</sub>               | 0.71     | 2.07     | 0.56  |
| CAJBEU                         | Sn <sub>9</sub>               | 1.50     | 0.46     | 0.30  |
| CUFSIF                         | Ge <sub>9</sub>               | 0.60     | 0.98     | 0.20  |
| DALHIH                         | Sn <sub>9</sub>               | 0.33     | 2.19     | 0.40  |
| HOQQUZ                         | Ge <sub>9</sub>               | 0.66     | 0.93     | 0.21  |
| HOQQUZ                         | Ge <sub>9</sub>               | 0.37     | 1.56     | 0.27  |
| HOQRAG                         | Ge <sub>9</sub>               | 0.58     | 1.19     | 0.26  |
| HOQRAG                         | Ge <sub>9</sub>               | 0.34     | 2.03     | 0.37  |
| NECPIV                         | Ge <sub>9</sub>               | 0.61     | 1.77     | 0.44  |
| NECPOB                         | Ge <sub>9</sub>               | 0.80     | 0.97     | 0.28  |
| NECPUH                         | Ge <sub>9</sub>               | 0.54     | 1.35     | 0.29  |
| SOGGAW                         | Ge <sub>9</sub>               | 1.24     | 1.65     | 0.63  |
| SOGGAW10                       | Ge <sub>9</sub>               | 1.24     | 1.65     | 0.63  |
| XAGDEO                         | Sn <sub>9</sub>               | 0.84     | 0.65     | 0.17  |
| XAGDEO01                       | Sn <sub>9</sub>               | 1.29     | 0.42     | 0.22  |
| YENBIC                         | Pb <sub>9</sub>               | 1.06     | 0.58     | 0.22  |
| YENBIF10                       | Sn <sub>9</sub>               | 0.97     | 0.62     | 0.21  |
| YENBIF10                       | Sn <sub>9</sub>               | 0.76     | 1.32     | 0.38  |
| YENBOI                         | Ge <sub>9</sub>               | 1.05     | 1.78     | 0.61  |
| YENBOI01                       | Ge <sub>9</sub>               | 1.05     | 1.78     | 0.61  |
| ZIMTAQ                         | Pb <sub>9</sub>               | 1.05     | 0.57     | 0.21  |
| <b>22 framework electrons:</b> |                               |          |          |       |
| BEHLOQ                         | Ge <sub>9</sub>               | 0.84     | 0.85     | 0.25  |
| BEHLUW                         | Ge <sub>9</sub>               | 0.88     | 0.58     | 0.16  |

|                                 |                 |      |      |      |
|---------------------------------|-----------------|------|------|------|
| BEHLUW                          | Ge <sub>9</sub> | 0.90 | 0.57 | 0.16 |
| BEHLUW                          | Ge <sub>9</sub> | 0.79 | 0.67 | 0.16 |
| BEHMAD                          | Ge <sub>9</sub> | 0.54 | 1.39 | 0.30 |
| BEHMIL                          | Ge <sub>9</sub> | 1.37 | 1.39 | 0.60 |
| 26227                           | Bi <sub>9</sub> | 1.63 | 1.35 | 0.66 |
| CRNASN01                        | Sn <sub>9</sub> | 0.37 | 2.41 | 0.47 |
| CRYGER                          | Ge <sub>9</sub> | 0.80 | 0.96 | 0.28 |
| CRYGER                          | Ge <sub>9</sub> | 0.42 | 2.28 | 0.47 |
| Cs <sub>4</sub> Ge <sub>9</sub> | Ge <sub>9</sub> | 0.39 | 2.18 | 0.43 |
| ENNASN10                        | Sn <sub>9</sub> | 1.30 | 2.11 | 0.77 |
| EQULIL                          | Ge <sub>9</sub> | 0.35 | 1.75 | 0.31 |
| EQULOR                          | Ge <sub>9</sub> | 0.48 | 1.55 | 0.32 |
| EQULOR                          | Ge <sub>9</sub> | 0.52 | 1.57 | 0.35 |
| EQULUX                          | Ge <sub>9</sub> | 0.50 | 1.28 | 0.25 |
| EQULUX                          | Ge <sub>9</sub> | 0.59 | 1.26 | 0.29 |
| EQUMAE                          | Ge <sub>9</sub> | 0.36 | 1.59 | 0.27 |
| EQUMAE                          | Ge <sub>9</sub> | 0.38 | 1.79 | 0.33 |
| FAFPAE                          | Ge <sub>9</sub> | 1.02 | 0.49 | 0.16 |
| FAFPEI                          | Ge <sub>9</sub> | 0.95 | 0.54 | 0.16 |
| GUDJAQ                          | Ge <sub>9</sub> | 0.46 | 1.67 | 0.34 |
| K <sub>4</sub> Sn <sub>9</sub>  | Sn <sub>9</sub> | 0.34 | 2.29 | 0.43 |
| KAWXUC                          | Ge <sub>9</sub> | 0.64 | 0.79 | 0.15 |
| Li <sub>4</sub> Sn <sub>9</sub> | Sn <sub>9</sub> | 0.31 | 2.22 | 0.39 |
| OHOHEY                          | Ge <sub>9</sub> | 2.74 | 3.96 | 1.49 |
| PUPGEM                          | Ge <sub>9</sub> | 0.76 | 1.66 | 0.47 |
| PUPGEM                          | Ge <sub>9</sub> | 0.74 | 1.80 | 0.50 |
| PUPGEM                          | Ge <sub>9</sub> | 0.44 | 2.51 | 0.53 |
| Rb <sub>4</sub> Pb <sub>9</sub> | Pb <sub>9</sub> | 0.59 | 2.63 | 0.63 |
| SUYTIP                          | Ge <sub>9</sub> | 0.67 | 1.47 | 0.38 |
| VARPEK                          | Sn <sub>9</sub> | 0.92 | 1.27 | 0.42 |
| VODTAJ                          | Sn <sub>9</sub> | 0.31 | 2.30 | 0.41 |
| XAGPEB                          | Ge <sub>9</sub> | 0.92 | 0.58 | 0.17 |
| XAGPIF                          | Ge <sub>9</sub> | 0.88 | 0.69 | 0.20 |
| XAGPIF                          | Ge <sub>9</sub> | 0.85 | 0.65 | 0.18 |
| XAGPOL                          | Ge <sub>9</sub> | 0.83 | 0.82 | 0.23 |
| XAGQAY                          | Ge <sub>9</sub> | 1.20 | 1.28 | 0.52 |
| XAGQEC                          | Ge <sub>9</sub> | 0.80 | 1.01 | 0.29 |
| XAGQIG                          | Ge <sub>9</sub> | 0.86 | 0.70 | 0.20 |
| XAGQOM                          | Ge <sub>9</sub> | 1.01 | 0.54 | 0.19 |
| XAGQOM                          | Ge <sub>9</sub> | 0.96 | 0.60 | 0.19 |

|                                  |                               |       |       |      |
|----------------------------------|-------------------------------|-------|-------|------|
| XUGTOI                           | Ge <sub>9</sub>               | 1.12  | 0.71  | 0.30 |
| XUGTOI                           | Ge <sub>9</sub>               | 1.19  | 0.71  | 0.31 |
| XUGTOI                           | Ge <sub>9</sub>               | 1.22  | 0.72  | 0.33 |
| ZIMSUJ                           | Pb <sub>9</sub>               | 0.37  | 2.35  | 0.46 |
| <b>24 framework electrons:</b>   |                               |       |       |      |
| MCNBOR                           | B <sub>7</sub> C <sub>2</sub> | 9.63  | 7.22  | 2.99 |
| B <sub>9</sub> H <sub>15</sub>   | B <sub>9</sub>                | 13.19 | 14.28 | 4.16 |
| CsB <sub>9</sub> H <sub>14</sub> | B <sub>9</sub>                | 10.90 | 8.35  | 3.28 |

---

\* Value of the deviation function from the minimal interconversion path.

**Table S4.** Shape measures of Supramolecular Assemblies with nine transition metal atoms relative to their closest ideal shape.

| Refcode  | M <sub>9</sub>                  | Shape  | S(shape) |
|----------|---------------------------------|--------|----------|
| JEBSEO   | Ni <sub>9</sub>                 | cCU-8  | 0.00     |
| IBEZIY   | Co <sub>9</sub>                 | cCU-8  | 0.82     |
| JAXSOQ   | Co <sub>9</sub>                 | cCU-8  | 0.92     |
| ACOFON   | Ni <sub>9</sub>                 | cCU-8  | 0.94     |
| BEQYUS   | Fe <sub>9</sub>                 | cCU-8  | 0.94     |
| BEQYUS   | Fe <sub>9</sub>                 | cCU-8  | 1.22     |
| ACOFIH   | Ni <sub>9</sub>                 | cCU-8  | 1.26     |
| EVADOU   | Sm <sub>9</sub>                 | cSAP-8 | 0.01     |
| EVADOU   | Sm <sub>9</sub>                 | cSAP-8 | 0.01     |
| PECFEJ   | Sm <sub>9</sub>                 | cSAP-8 | 0.01     |
| RAKPID   | Eu <sub>9</sub>                 | cSAP-8 | 0.01     |
| HOVDAX   | Y <sub>9</sub>                  | cSAP-8 | 0.02     |
| CUNDOE10 | Fe <sub>7</sub> 2Mo             | dT-9   | 0.15     |
| CUNDOE20 | Fe <sub>7</sub> 2Mo             | dT-9   | 0.15     |
| TBBZFM10 | Cu <sub>9</sub>                 | dT-9   | 0.22     |
| BAESMC   | Fe <sub>7</sub> 2W              | dT-9   | 0.22     |
| JASCIP   | Fe <sub>7</sub> Re              | dT-9   | 0.24     |
| JASCIP10 | Fe <sub>7</sub> Re              | dT-9   | 0.24     |
| JETBAL   | Fe <sub>7</sub> Re              | dT-9   | 0.24     |
| BMETFM10 | Fe <sub>7</sub> 2Mo             | dT-9   | 0.31     |
| VOMKUD   | Cu <sub>9</sub>                 | dT-9   | 0.35     |
| KARFIT   | Ni <sub>9</sub>                 | dT-9   | 0.99     |
| KARFIT   | Ni <sub>9</sub>                 | dT-9   | 1.06     |
| ZOPBOV   | Au <sub>8</sub> Pd              | dT-9   | 2.98     |
| ZOPBOV10 | Au <sub>8</sub> Pd              | dT-9   | 2.98     |
| UGUTEV   | Co <sub>9</sub>                 | dT-9   | 3.40     |
| CATMAM   | Cr <sub>8</sub> Cd              | EP-9   | 0.34     |
| AHAYOX01 | Ni <sub>9</sub>                 | EP-9   | 0.76     |
| QOZPIE   | Pd <sub>6</sub> Zn <sub>3</sub> | fOC-9  | 0.38     |
| GIWKIG   | Cu <sub>9</sub>                 | fOC-9  | 4.12     |
| JOZCAC   | Cd <sub>9</sub>                 | HG-9   | 0.06     |
| YESYIE   | Ir <sub>8</sub> Fe              | HG-9   | 1.35     |
| ECAQOP   | Fe <sub>9</sub>                 | HG-9   | 2.00     |
| WIHBAQ   | Cu <sub>9</sub>                 | JCCU-9 | 0.07     |
| ZUBKEM   | W <sub>9</sub>                  | JTC-9  | 0.14     |
| EGIQUG   | Mn <sub>9</sub>                 | JTC-9  | 4.41     |



|          |                                 |          |      |
|----------|---------------------------------|----------|------|
| DERPEV   | Cu <sub>9</sub>                 | JTTP-9   | 0.43 |
| GUCVAB   | Ni <sub>9</sub>                 | rTCTPR-9 | 0.49 |
| EBAKAU   | Mn <sub>9</sub>                 | SG-9     | 0.47 |
| MURMUH   | Mn <sub>9</sub>                 | SG-9     | 0.77 |
| EBAKIC   | Mn <sub>9</sub>                 | SG-9     | 0.81 |
| FAJJOQ   | Mn <sub>9</sub>                 | SG-9     | 0.84 |
| SURDIS   | Co <sub>9</sub>                 | SG-9     | 1.29 |
| MURNAO   | Mn <sub>9</sub>                 | SG-9     | 1.51 |
| EBAKUO   | Mn <sub>9</sub>                 | SG-9     | 1.72 |
| EBAKEY   | Mn <sub>9</sub>                 | SG-9     | 2.02 |
| WONSOH   | Au <sub>6</sub> Fe <sub>3</sub> | SG-9     | 2.09 |
| EBAKOI   | Mn <sub>9</sub>                 | SG-9     | 2.15 |
| FAJKEH   | Mn <sub>9</sub>                 | SG-9     | 2.28 |
| FAJKEH01 | Mn <sub>9</sub>                 | SG-9     | 2.45 |
| EBAKIC   | Mn <sub>9</sub>                 | SG-9     | 2.48 |
| FAPGUZ   | Cu <sub>9</sub>                 | SG-9     | 2.56 |
| MURNES   | Zn <sub>9</sub>                 | SG-9     | 2.65 |
| KANBOQ   | Mn <sub>9</sub>                 | SG-9     | 2.75 |
| FAJKAD   | Mn <sub>9</sub>                 | SG-9     | 2.81 |
| AGOYEA   | Cu <sub>9</sub>                 | SG-9     | 2.82 |
| FAJJUW   | Mn <sub>9</sub>                 | SG-9     | 3.05 |
| EBALAV   | Mn <sub>9</sub>                 | SG-9     | 3.97 |
| ROJFUR   | Co <sub>9</sub>                 | vTBPY-9  | 0.20 |

---

**Table S5.** Shape Measures and Path Deviation Functions for Supramolecular Assemblies forming 3x3 Grids (Figure 7).

| Refcode    | S(SG-9) | S(HL-9) | Dev. (%) |
|------------|---------|---------|----------|
| EBAKAU (c) | 0.47    | 6.69    | 26       |
| MURMUH     | 0.77    | 5.29    | 22       |
| EBAKIC     | 0.81    | 5.67    | 74       |
| FAJJOQ     | 0.84    | 5.69    | 27       |
| SURDIS     | 1.29    | 7.83    | 52       |
| MURNAO     | 1.51    | 3.80    | 22       |
| EBAKUO     | 1.72    | 3.07    | 18       |
| EBAKEY     | 2.02    | 8.59    | 68       |
| WONSOH     | 2.09    | 8.54    | 69       |
| EBAKOI     | 2.15    | 8.44    | 69       |
| FAJKEH     | 2.28    | 8.08    | 68       |
| FAJKEH01   | 2.45    | 8.32    | 72       |
| EBAKIC     | 2.48    | 8.60    | 26       |
| YESYIE (b) | 2.52    | 1.35    | 5        |
| FAPGUZ     | 2.56    | 7.74    | 69       |
| MURNES     | 2.65    | 9.15    | 80       |
| KANBOQ     | 2.75    | 9.14    | 81       |
| FAJKAD     | 2.81    | 9.26    | 82       |
| AGOYEA     | 2.82    | 7.27    | 69       |
| FAJJUW     | 3.05    | 9.54    | 87       |
| EBALAV     | 3.97    | 10.41   | 102      |
| YEMXAP (d) | 5.25    | 0.22    | 6        |
| DILRUL (d) | 5.49    | 0.13    | 4        |
| NEPFAP     | 5.62    | 11.77   | 125      |
| JOZCAC (a) | 6.70    | 0.06    | 9        |
| ECAQOP     | 8.50    | 2.00    | 67       |
